# Supplementary material for: A Framework for Interfacing and Partnering with Environmental Justice Communities as a Prelude to Human Health and Hazard Identification in the Vulnerable Census Tracts of Columbus, Ohio
Source: MDPI journal article supplement (doi:10.3390/ijerph192113846), 2022-10-25
Supplement: s1 [file s1]

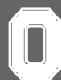

## Environmental Exposure History Questionnaire Division of Environmental Health Sciences

### COMMUNITY

**For each of the items listed below:**

**Do you presently live nearby**

**If you ever lived nearby, please write the years.**

- |                            |                             |                                                           |                               |                                   |       |
|----------------------------|-----------------------------|-----------------------------------------------------------|-------------------------------|-----------------------------------|-------|
| 1. Heavy traffic           | <input type="checkbox"/> No | <input type="checkbox"/> Yes <i>(please specify)</i>      | <input type="radio"/> highway | <input type="radio"/> busy street | <hr/> |
| 2. Vehicle idling area     | <input type="checkbox"/> No | <input type="checkbox"/> Yes <i>(please specify)</i>      | <input type="radio"/> auto    | <input type="radio"/> bus/truck   | <hr/> |
| 3. Dump site               | <input type="checkbox"/> NO | <input type="checkbox"/> Yes <i>(please specify type)</i> | <hr/>                         |                                   | <hr/> |
| 4. Farm(s)                 | <input type="checkbox"/> No | <input type="checkbox"/> Yes <i>(please specify type)</i> | <hr/>                         |                                   | <hr/> |
| 5. Industrial plant(s)     | <input type="checkbox"/> No | <input type="checkbox"/> Yes <i>(please specify type)</i> | <hr/>                         |                                   | <hr/> |
| 6. Polluted lake/stream    | <input type="checkbox"/> No | <input type="checkbox"/> Yes <i>(please specify type)</i> | <hr/>                         |                                   | <hr/> |
| 7. Nuclear power plant     | <input type="checkbox"/> No | <input type="checkbox"/> Yes                              |                               |                                   |       |
| 8. Hydro towers            | <input type="checkbox"/> No | <input type="checkbox"/> Yes                              |                               |                                   |       |
| 9. Other potential hazards | <input type="checkbox"/> No | <input type="checkbox"/> Yes <i>(please specify type)</i> | <hr/>                         |                                   |       |
10. Do you protect yourself from excess sun exposure? ☐ rarely    ☐ occasionally    ☐ often    ☐ always

### HOME & HOBBY

11. How long have you lived in your present residence? 

---

 How old is it? 

---
12. What type of dwelling is your residence? ☐ house    ☐ mobile home  
☐ apartment → ☐ basement    ☐ 2<sup>nd</sup> floor    ☐ high rise → floor
13. Ownership?    ☐ owner occupied    ☐ rental    ☐ public housing
14. Do you use:    ☐ central vacuum?    ☐ HEPA filter vacuum?    ☐ other vacuum? 

---
15. Have you done any renovating?    ☐ No    ☐ Yes → When? 

---

What? 

---
16. Do you own/lease a car?    ☐ No    ☐ Yes → Age? 

---

 Smoking permitted inside?    ☐ No    ☐ Yes
17. Do you use pesticide or herbicides (bug or weed killer, flea/tick sprays, collars, powders, pellets, etc.):
- A in your home?    ☐ No    ☐ Yes *(please specify type)* 

---
- B on your pets?    ☐ No    ☐ Yes *(please specify type)* 

---
- C on your lawn or garden?    ☐ No    ☐ Yes *(please specify type)* 

---

## SCHOOL (if applicable)

18. How old is your or your child's school? \_\_\_\_\_ Number of floors: \_\_\_\_\_ Number of occupants: \_\_\_\_\_

19. Have additions been made to the original building? ☐ No ☐ Yes → When? \_\_\_\_\_

20. Number of portable classrooms in use: \_\_\_\_\_

21. Hours per day you or your child spends in a portable classroom: \_\_\_\_\_

22. School neighborhood: ☐ rural ☐ suburban ☐ urban

### 23. Is your or your child's school located near any of the following:

- |                         |                                                                                |                                                                 |
|-------------------------|--------------------------------------------------------------------------------|-----------------------------------------------------------------|
| Heavy traffic           | <input type="checkbox"/> No <input type="checkbox"/> Yes (please specify)      | <input type="radio"/> highway <input type="radio"/> busy street |
| Vehicle idling area     | <input type="checkbox"/> No <input type="checkbox"/> Yes (please specify)      | <input type="radio"/> auto <input type="radio"/> bus/truck      |
| Dump site               | <input type="checkbox"/> No <input type="checkbox"/> Yes (please specify type) | _____                                                           |
| Farm(s)                 | <input type="checkbox"/> No <input type="checkbox"/> Yes (please specify type) | _____                                                           |
| Industrial plant(s)     | <input type="checkbox"/> No <input type="checkbox"/> Yes (please specify type) | _____                                                           |
| Polluted lake/stream    | <input type="checkbox"/> No <input type="checkbox"/> Yes (please specify type) | _____                                                           |
| Nuclear power plant     | <input type="checkbox"/> No <input type="checkbox"/> Yes                       |                                                                 |
| Hydro towers            | <input type="checkbox"/> No <input type="checkbox"/> Yes                       |                                                                 |
| Other potential hazards | <input type="checkbox"/> No <input type="checkbox"/> Yes (please specify type) | _____                                                           |

### 24. Which of the following does you or your child's school have? (Please check all that apply)

- |                                                   |                                                   |                                                   |                                                    |
|---------------------------------------------------|---------------------------------------------------|---------------------------------------------------|----------------------------------------------------|
| <input type="checkbox"/> carpeted classrooms      | <input type="checkbox"/> central air conditioning | <input type="checkbox"/> art room-exhaust hood?   | <input type="radio"/> No <input type="radio"/> Yes |
| <input type="checkbox"/> unvented copy machine(s) | <input type="checkbox"/> windows that open        | <input type="checkbox"/> laboratory-exhaust hood? | <input type="radio"/> No <input type="radio"/> Yes |
| <input type="checkbox"/> flaking paints           | <input type="checkbox"/> moldy smell              | <input type="checkbox"/> workshop-exhaust hood?   | <input type="radio"/> No <input type="radio"/> Yes |

### 25. Have any of the following occurred in your or your child's school during the current or last school year? (Please check all that apply)

- |                                                                           |                                                           |                                                              |                                |
|---------------------------------------------------------------------------|-----------------------------------------------------------|--------------------------------------------------------------|--------------------------------|
| <input type="checkbox"/> carpet cleaning                                  | <input type="checkbox"/> construction                     | <input type="checkbox"/> renovation                          | <input type="radio"/> painting |
| <input type="checkbox"/> new flooring or furniture (please specify) _____ |                                                           | <input type="checkbox"/> flood, water leaks                  |                                |
| <input type="checkbox"/> roof tarring                                     | <input type="checkbox"/> use of pesticides / herbicides → | <input type="radio"/> indoors <input type="radio"/> outdoors |                                |

### 26. Are the following products used in your or your child's school during the school year? (Please check all that apply)

- |                                            |                                                       |                                                    |
|--------------------------------------------|-------------------------------------------------------|----------------------------------------------------|
| <input type="checkbox"/> deodorizer strips | <input type="checkbox"/> furniture wax or polish      | <input type="checkbox"/> odorous cleaning products |
| <input type="checkbox"/> floor wax         | <input type="checkbox"/> scented washroom soap        | <input type="checkbox"/> spray paints              |
| <input type="checkbox"/> permanent markers | <input type="checkbox"/> strong-smelling art supplies |                                                    |

### 27. Does you or your child's school have a policy regarding the use of personal scented products by staff and students?

- ☐ No ☐ Yes (*please specify*) → ☐ prohibition of scented products ☐ encouragement of unscented products

### Occupational Exposure Inventory

(Please check all that apply)

28. Have you ever been off work for more than 1 day because of an illness related to work? ☐ No ☐ Yes

29. Have you ever been advised to change jobs or work assignments because of any health problems or injuries? ☐ No ☐ Yes

30. Has your work routine changed recently? ☐ No ☐ Yes

31. Is there poor ventilation in your workplace? ☐ No ☐ Yes

### Environmental History

(Please check all that apply)

32. Which of the following do you have in your home?

- ☐ Air conditioner ☐ Air purifier ☐ Central heating (gas or oil?)  
☐ Fireplace ☐ Wood stove ☐ Humidifier

33. Have you recently acquired: new furniture or carpet ☐ No ☐ Yes

Refinished furniture ☐ No ☐ Yes Remodeled your home ☐ No ☐ Yes

34. Have you weatherized your home recently? ☐ No ☐ Yes

35. Do you (or any household member) have a hobby or craft? ☐ No ☐ Yes

36. Do you work on your car? ☐ No ☐ Yes

37. Have you ever changed your residence because of a health problem? ☐ No ☐ Yes

38. Does your drinking water come from a private well, ☐ No ☐ Yes, city water supply ☐ No ☐ Yes or grocery store ☐ No ☐ Yes

**If you answered yes to any of the questions, please explain below.**

**39. For each of the items listed below: Do you presently have in your HOME?**

Pets ☐ No ☐ Yes (*please specify kind & number*) \_\_\_\_\_

Pets sleep in your bedroom ☐ No ☐ Yes

Indoor plants ☐ No ☐ Yes → *How many?* \_\_\_\_\_

**40. Do you use dust mite-proof: Pillow cover(s)?** ☐ No ☐ Yes **Mattress cover(s)?** ☐ No ☐ Yes

**41. What hobbies do you have?** \_\_\_\_\_

42. What hobbies do members of your household have? \_\_\_\_\_

\_\_\_\_\_

\_\_\_\_\_

43. Have you ever personally done any of the following:

- ☐ furniture stripping/refinishing      ☐ No   ☐ Yes      Years: \_\_\_\_\_
- ☐ home renovating      ☐ No   ☐ Yes      Years: \_\_\_\_\_ (please specify type)
- ☐ art work (e.g. painting, ceramic stained glass, leather work, etc.)      ☐ No   ☐ Yes      Years: \_\_\_\_\_ (please specify type)
- ☐ other non-occupational activities with exposure to toxic chemicals      ☐ No   ☐ Yes  
Years: \_\_\_\_\_ (please specify type)

## PERSONAL

### Natural Inhalant Allergies

44. Do you think you are allergic to any seasonal pollens, animal danders, dust, mites, or molds?

- ☐ No      ☐ Yes (please specify which) \_\_\_\_\_

45. Have you ever had allergy tests?   ☐ No      ☐ Yes

If YES, please specify:

| Age | Year | Type of Test | Results | Treatments<br>(e.g. avoidance, shots, Medications) | Improvement<br>0=worse 1=none 2=a little<br>3=some 4=a lot |
|-----|------|--------------|---------|----------------------------------------------------|------------------------------------------------------------|
|     |      |              |         |                                                    |                                                            |
|     |      |              |         |                                                    |                                                            |

### Synthetic Chemicals

46. Have you ever had symptoms you linked with exposure to any synthetic (man-made) chemicals at a level that did not seem to bother most people (e.g. paints, perfumes, cosmetics, diesel exhaust, jet fuel, tar, etc.)?

- ☐ No      ☐ Yes

**'Linked'** means that the symptom started or worsened within 48 hours after you were exposed to something, or the symptom improved or disappeared after you were no longer exposed to it.

**'Exposure'** means being near, touching, smelling, breathing in, eating, drinking, swallowing or injecting something.

If YES, please specify chemical(s) and symptom(s):

| Man-made Chemical | Symptoms Linked with Low Level Exposure | Presently Affected?<br>1= a little 2=somewhat 3=a lot | In the Past<br>1=a little 2=somewhat 3=a lot |
|-------------------|-----------------------------------------|-------------------------------------------------------|----------------------------------------------|
|                   |                                         |                                                       |                                              |
|                   |                                         |                                                       |                                              |
|                   |                                         |                                                       |                                              |
|                   |                                         |                                                       |                                              |

47. How often do you use SCENTED personal products? (please check)

| <b>Scented Products</b> | <u>Soap</u>              | <u>Lotion</u>            | <u>Cosmetics</u>         | <u>Hair permanent</u>    | <u>Hair tint</u>         | <u>Perfume/aftershave</u> | <u>Other(s)</u><br>(please specify) |
|-------------------------|--------------------------|--------------------------|--------------------------|--------------------------|--------------------------|---------------------------|-------------------------------------|
| Never                   | <input type="checkbox"/>  | <input type="checkbox"/>            |
| Occasionally            | <input type="checkbox"/>  | <input type="checkbox"/>            |
| Daily                   | <input type="checkbox"/>  | <input type="checkbox"/>            |

### Artificial Materials

48. How many metal dental fillings / caps do you currently have? silver / mercury \_\_\_\_\_ gold \_\_\_\_\_

49. Have you had silver / mercury fillings removed? ☐ No ☐ Yes → Number removed: \_\_\_\_ Year(s): \_\_\_\_

50. Do you have other artificial materials in your body (e.g. pins, screws, plates, meshes, valves, implants, etc.)?

☐ No ☐ Yes (please specify) \_\_\_\_\_

### Smoking History

51. Do you currently use tobacco (daily or almost every day)?

☐ No ☐ Yes (please specify) → ☐ cigarettes ☐ cigars ☐ pipe ☐ snuff ☐ chewing tobacco

- If **Yes** average number per day: \_\_\_\_\_ Average number per day: \_\_\_\_\_
- If **No**, have you ever used tobacco (daily or almost every day)? ☐ No ☐ Yes  
If **YES**, number of years you used tobacco: \_\_\_\_\_ Average number per day: \_\_\_\_\_  
Date you last used tobacco regularly: Year \_\_\_\_\_

### Demographics

52. How old are you?

- 18-29
- 30-39
- 40-49
- 50-59

53. What is your highest level of education?

- Did not graduate from high school
- Graduated high school
- Some college
- Graduated college
- Some postgraduate education
- Professional degree

54. What is your zip code? \_\_\_\_\_
